# Supplementary material
Source: PubMed Central journal article supplement (PMC11028206)

Supplementary Figure 1. Dual histograms of the serum autoantibody levels to the tumor-associated antigens (**Panel a**, 14-3-3  $\zeta$ ; **b**, HCC1; **c**, IMP1; **d**, KOC; **e**, MDM2; **f**, NPM1; **g**, P16; **h**, P53; **i**, P62; **j**, P90; **k**, RalA; **l**, survivin), for the hepatocellular cancer patients (designated cases in the figure, n=160) and normals (designated controls in the figure, n=90). The ordinates in these panels are antibody titers to the various cancer-associated antigens, expressed as absorbance units (optical densities, ODs) from enzyme immunoassays, as described in the Methods.

a. 14-3-3 zeta

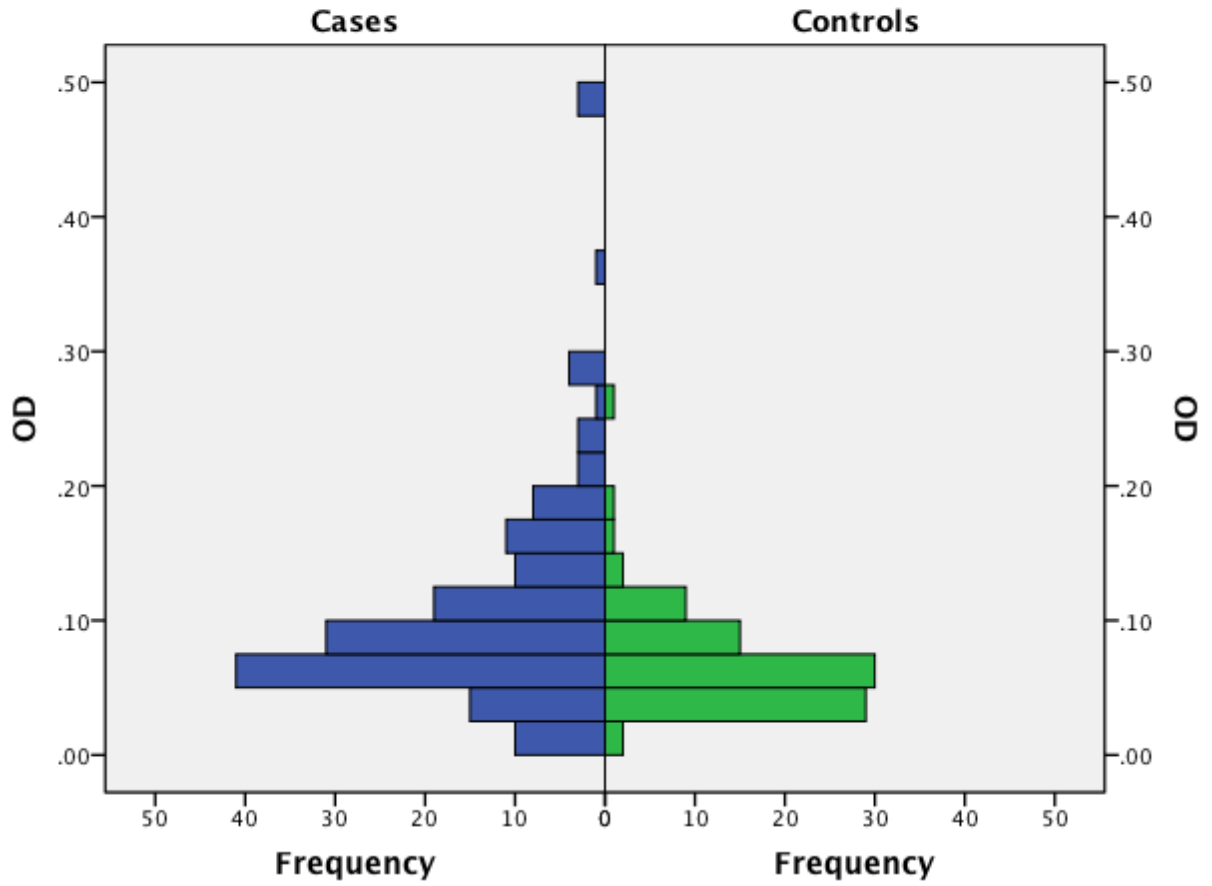

**b. HCC1**

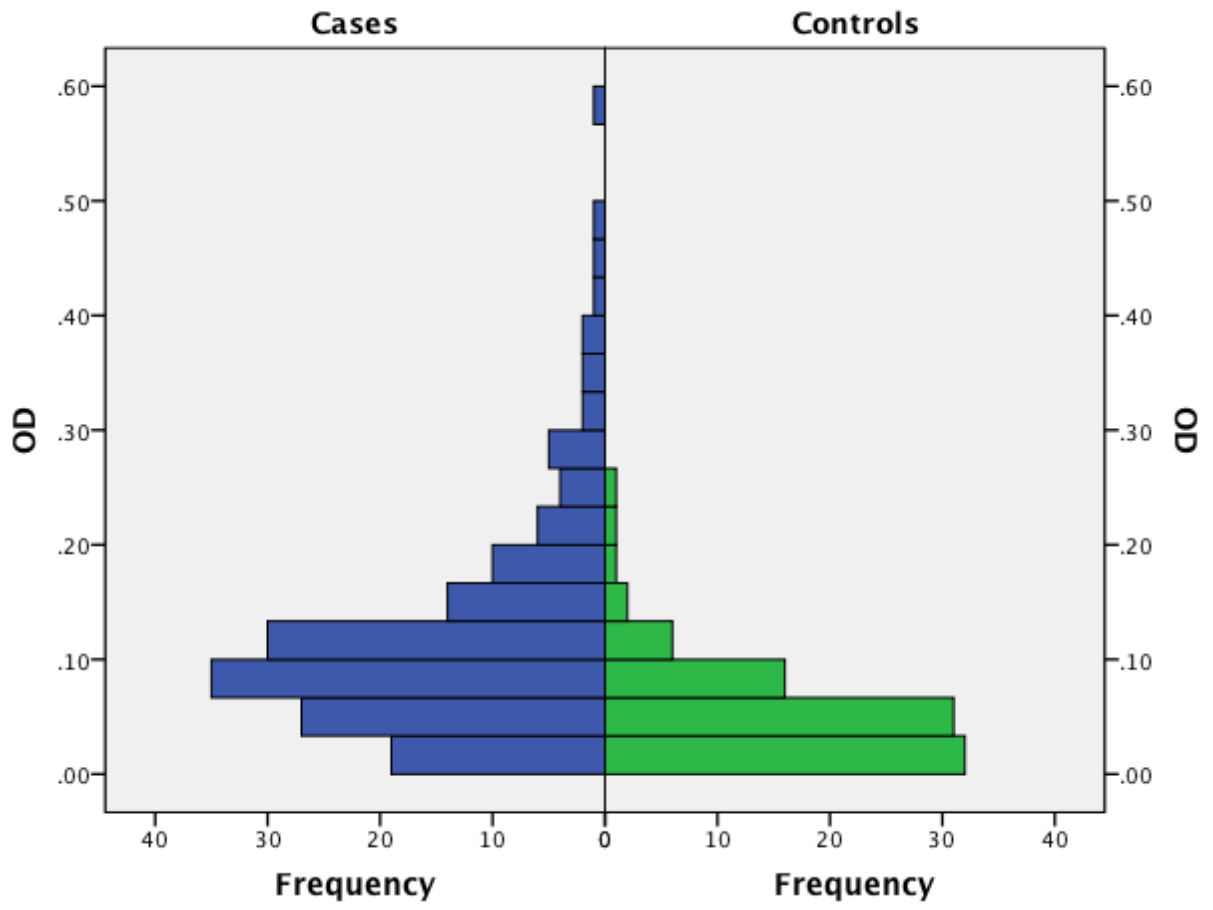

c. IMP1

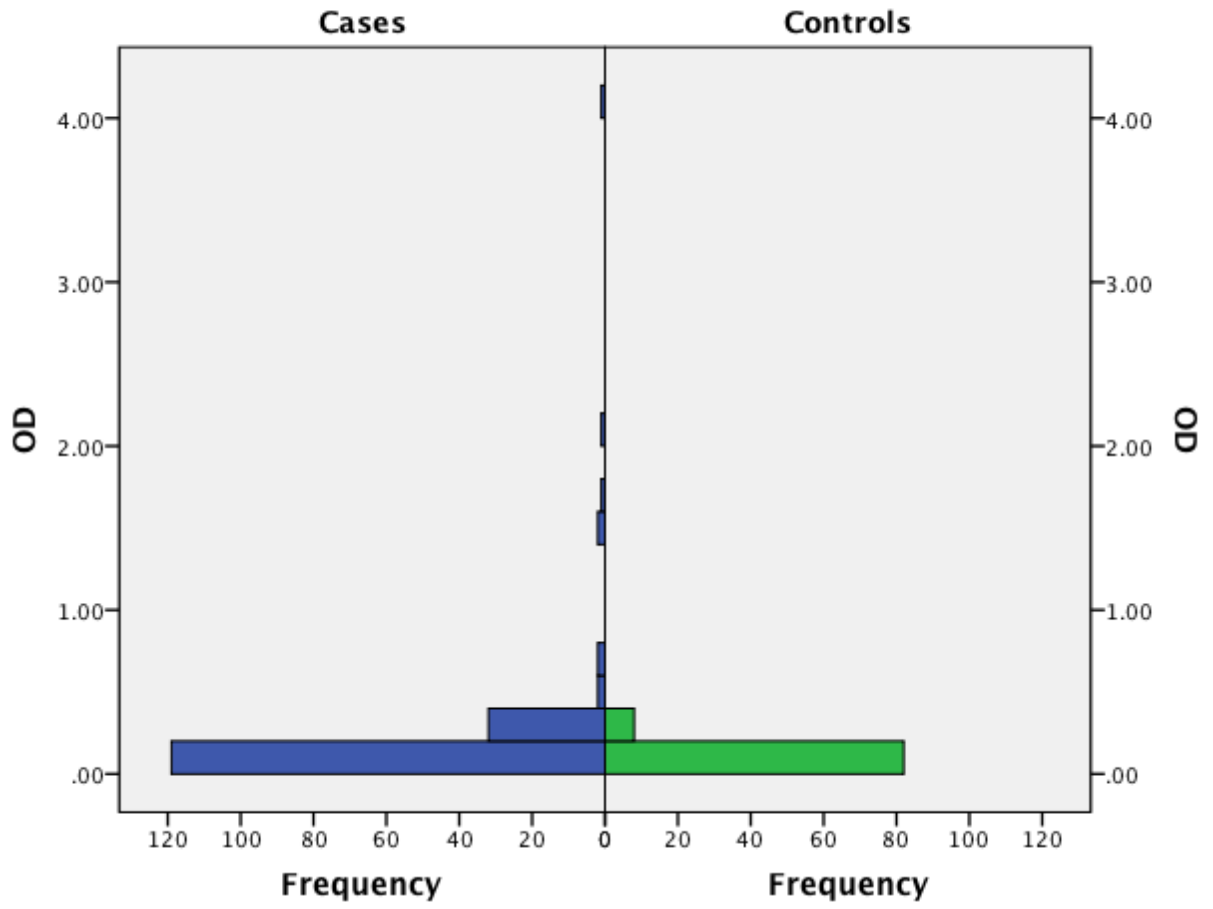

d. KOC

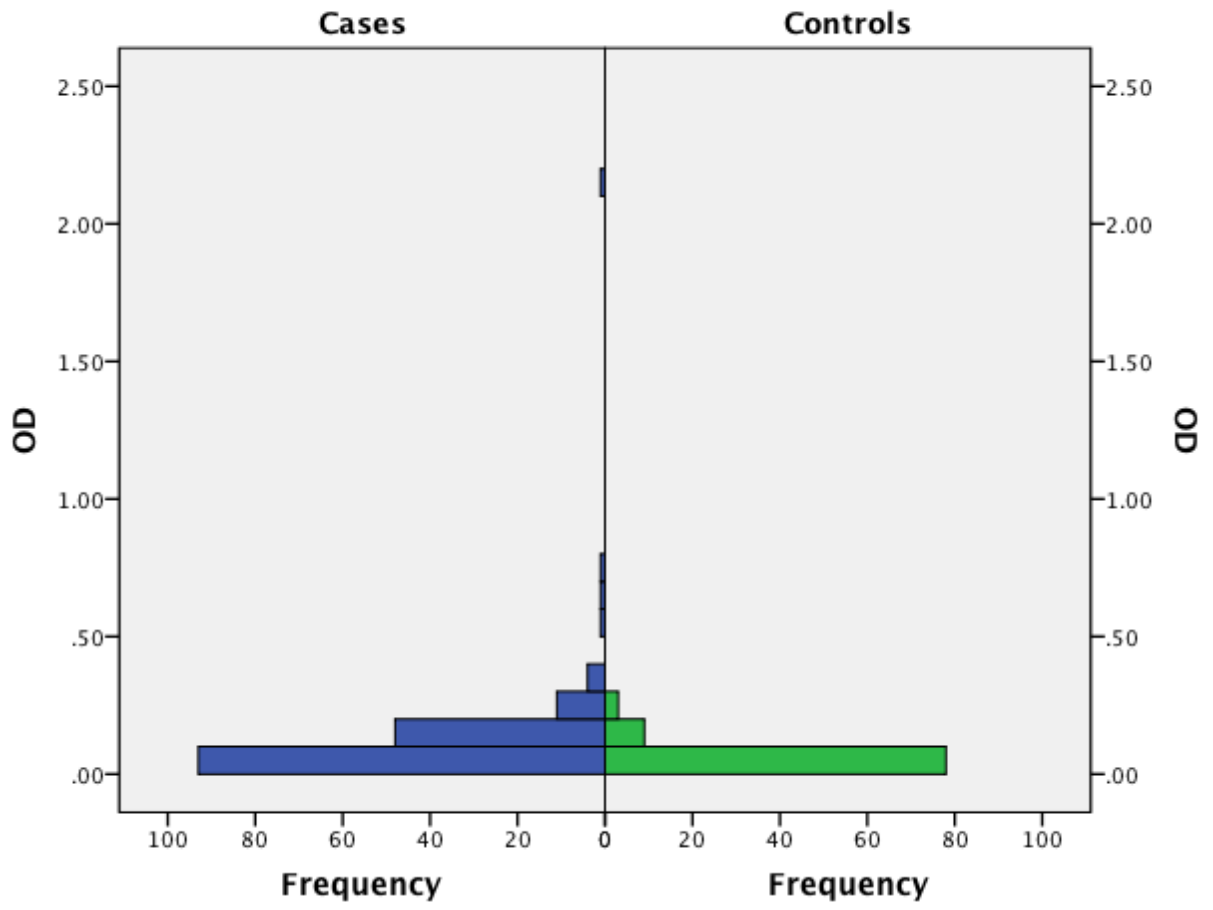

e. MDM2

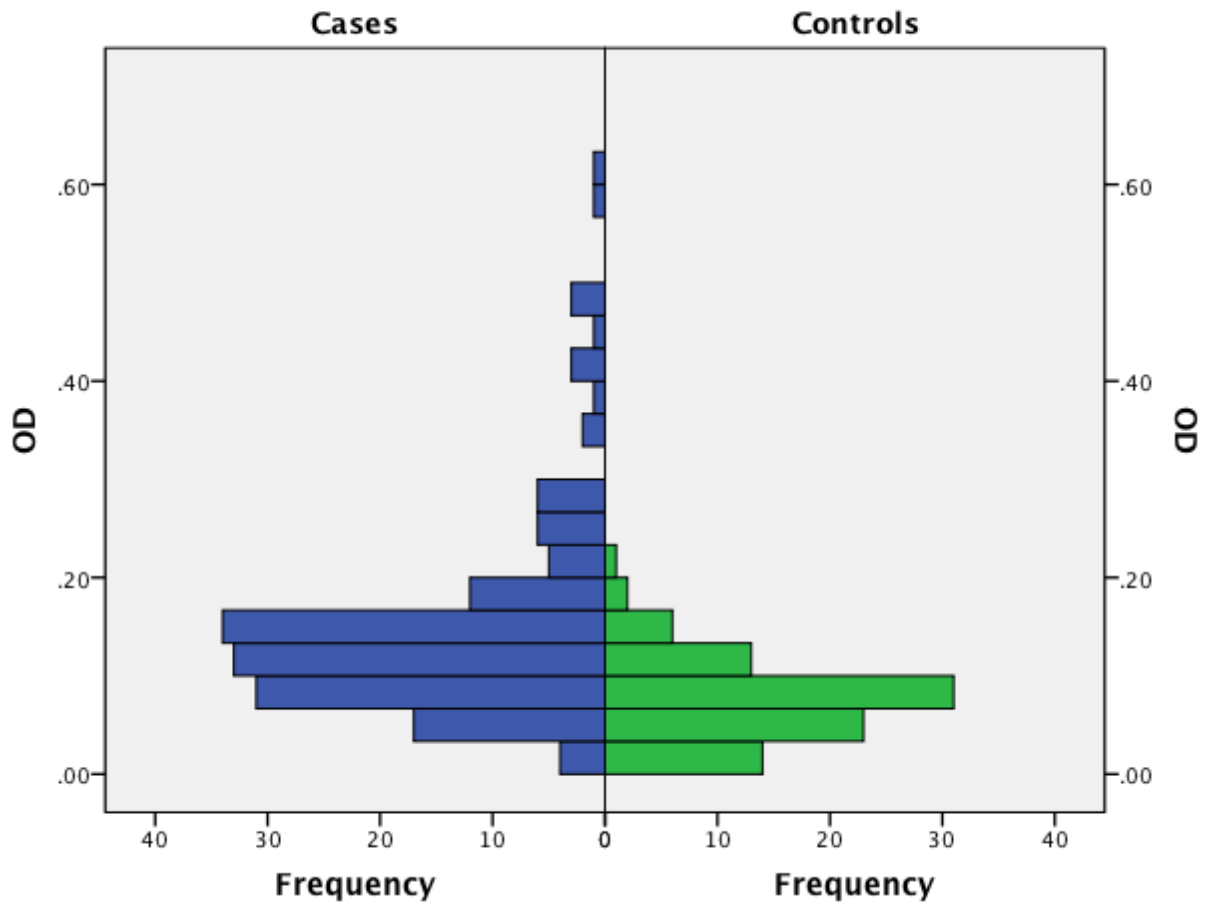

f. NPM1

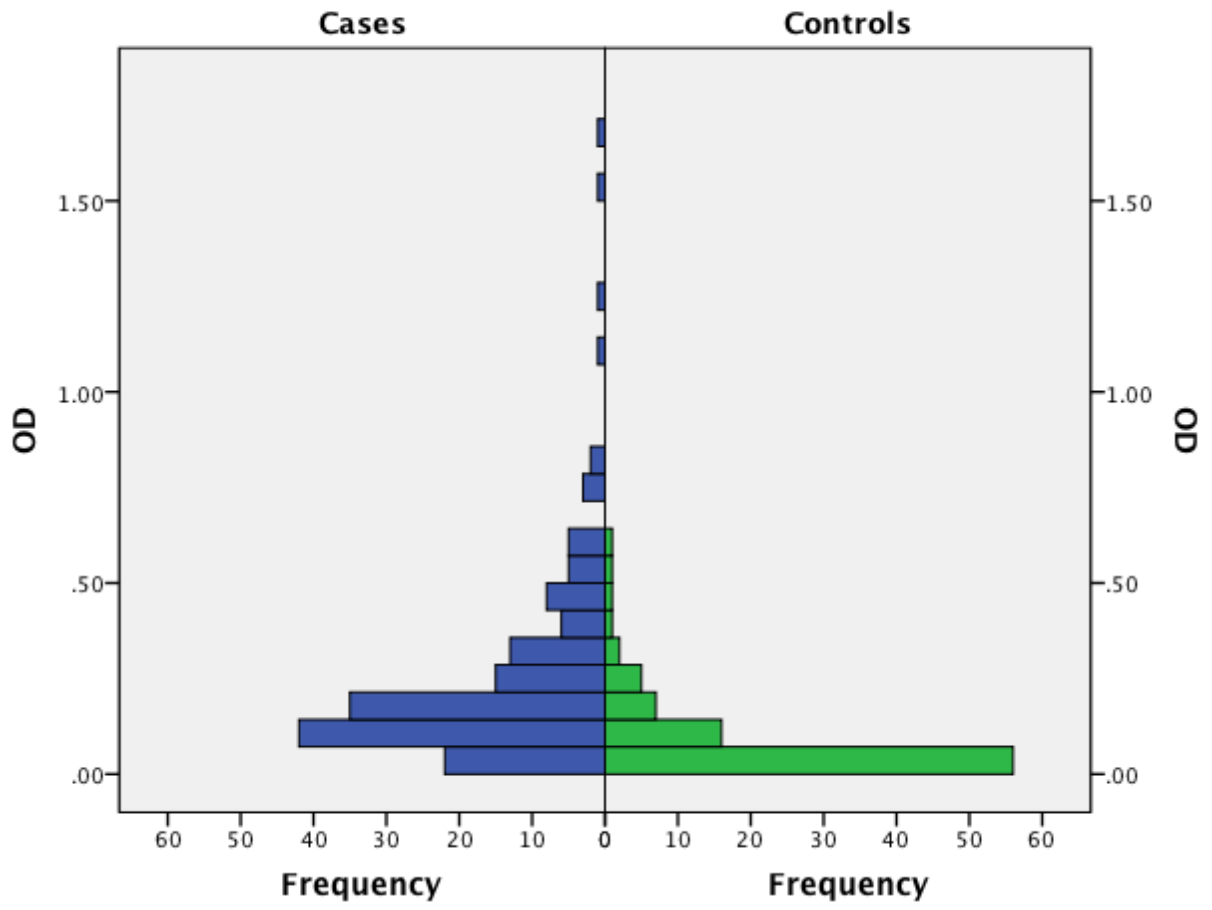

**g. P16**

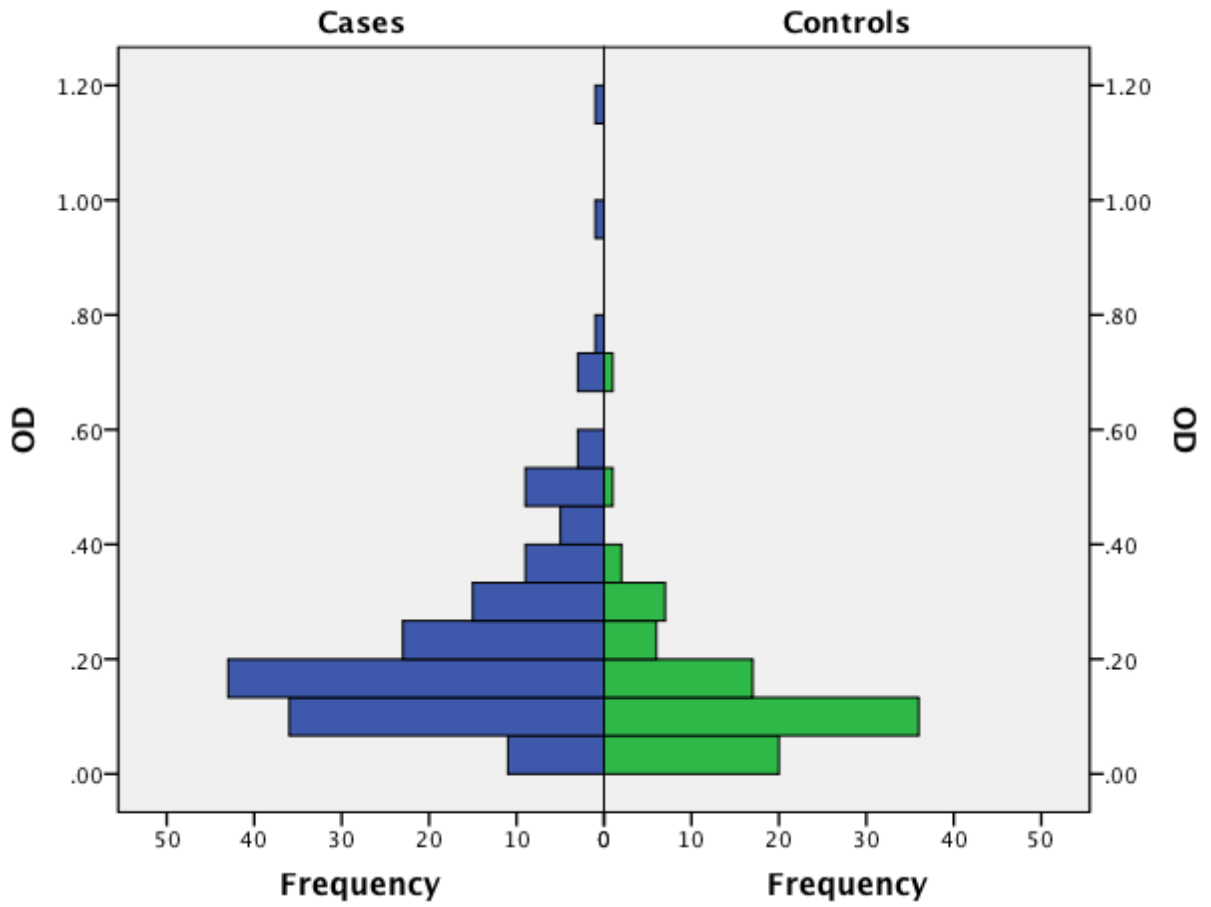



### h. P53

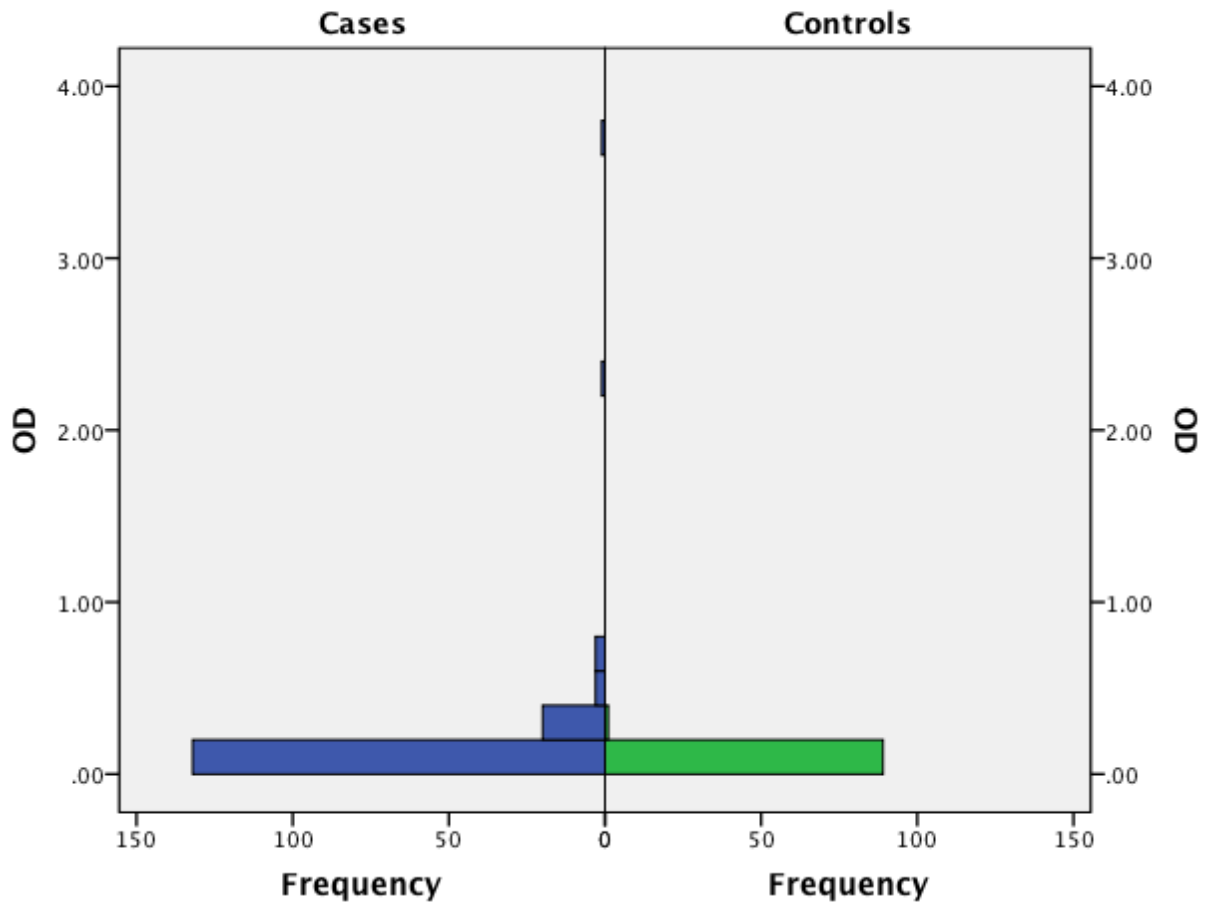

i. P62

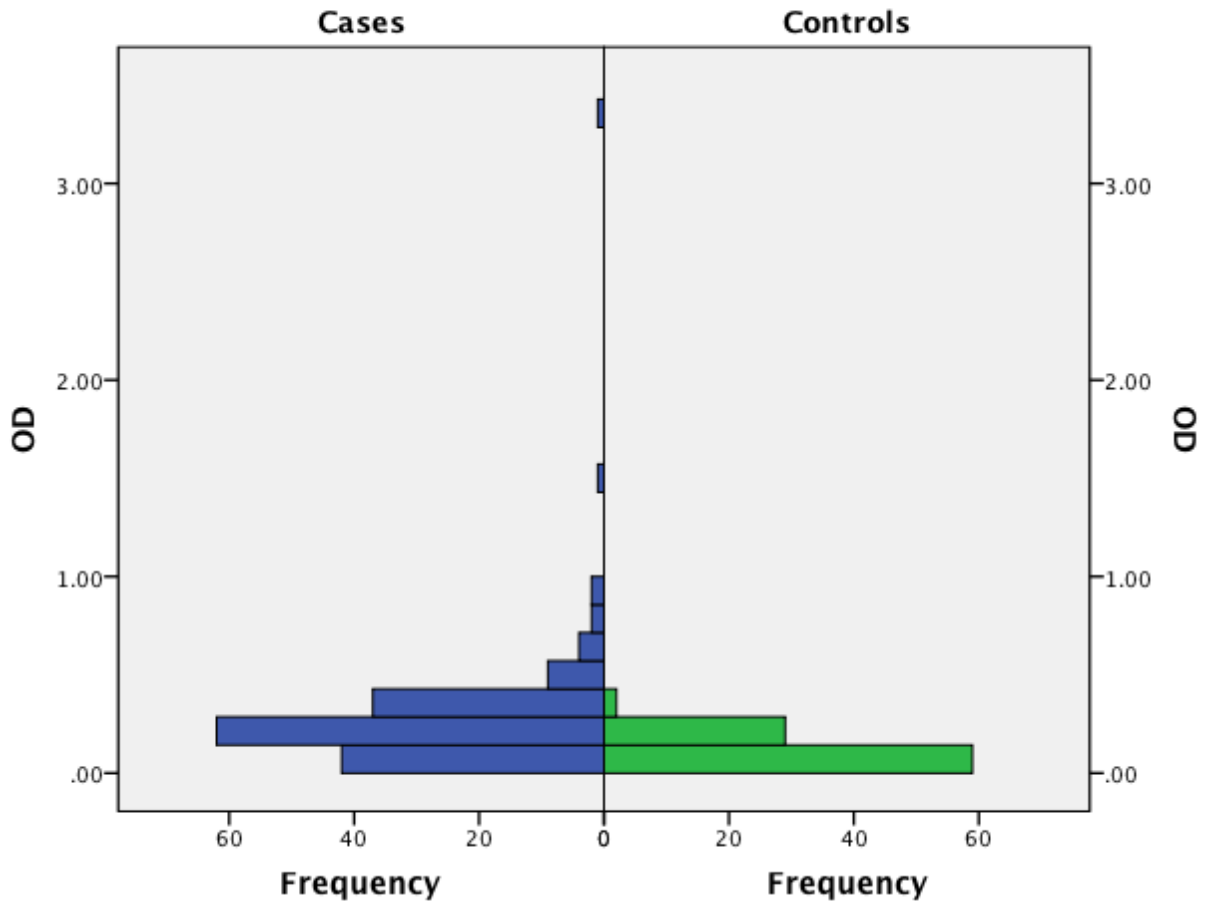

j. P90

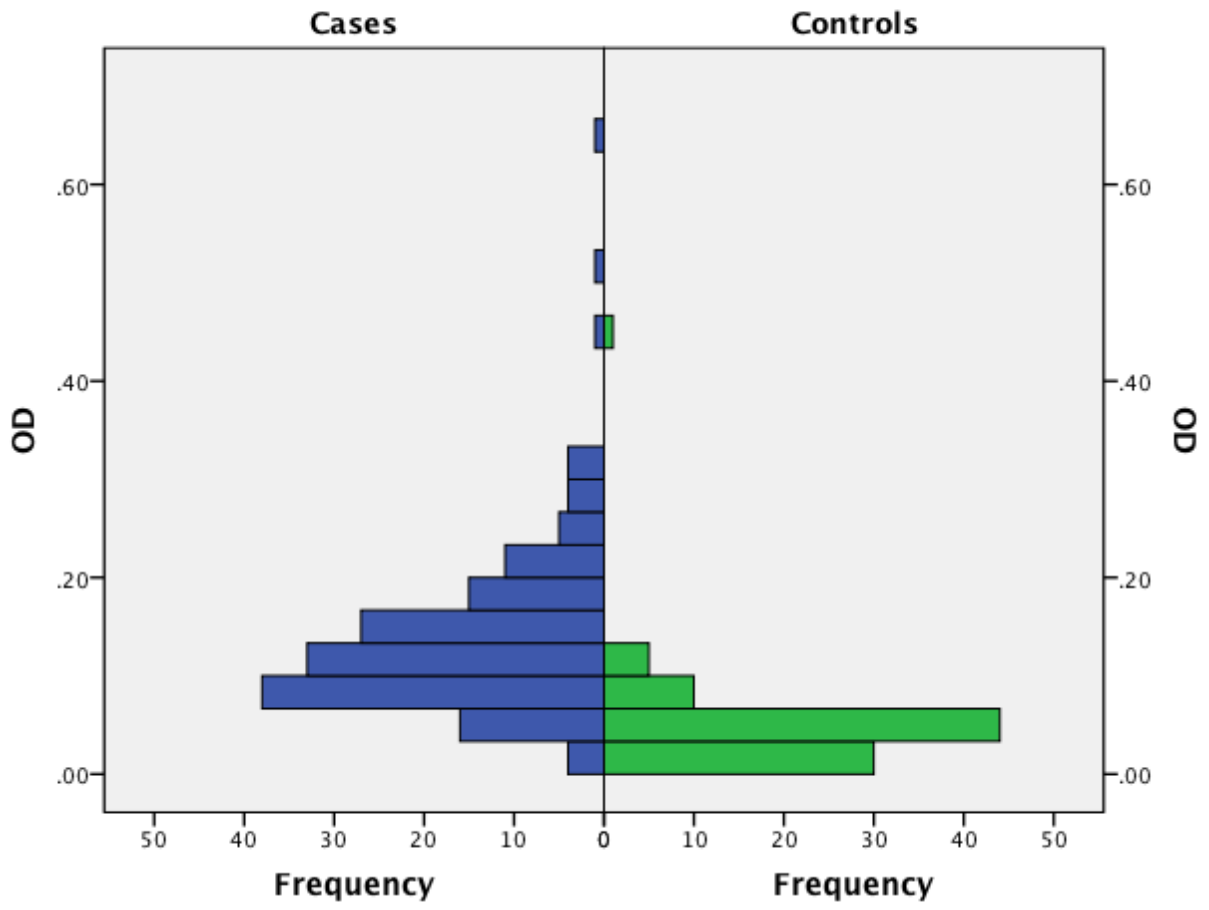

k. RaIA

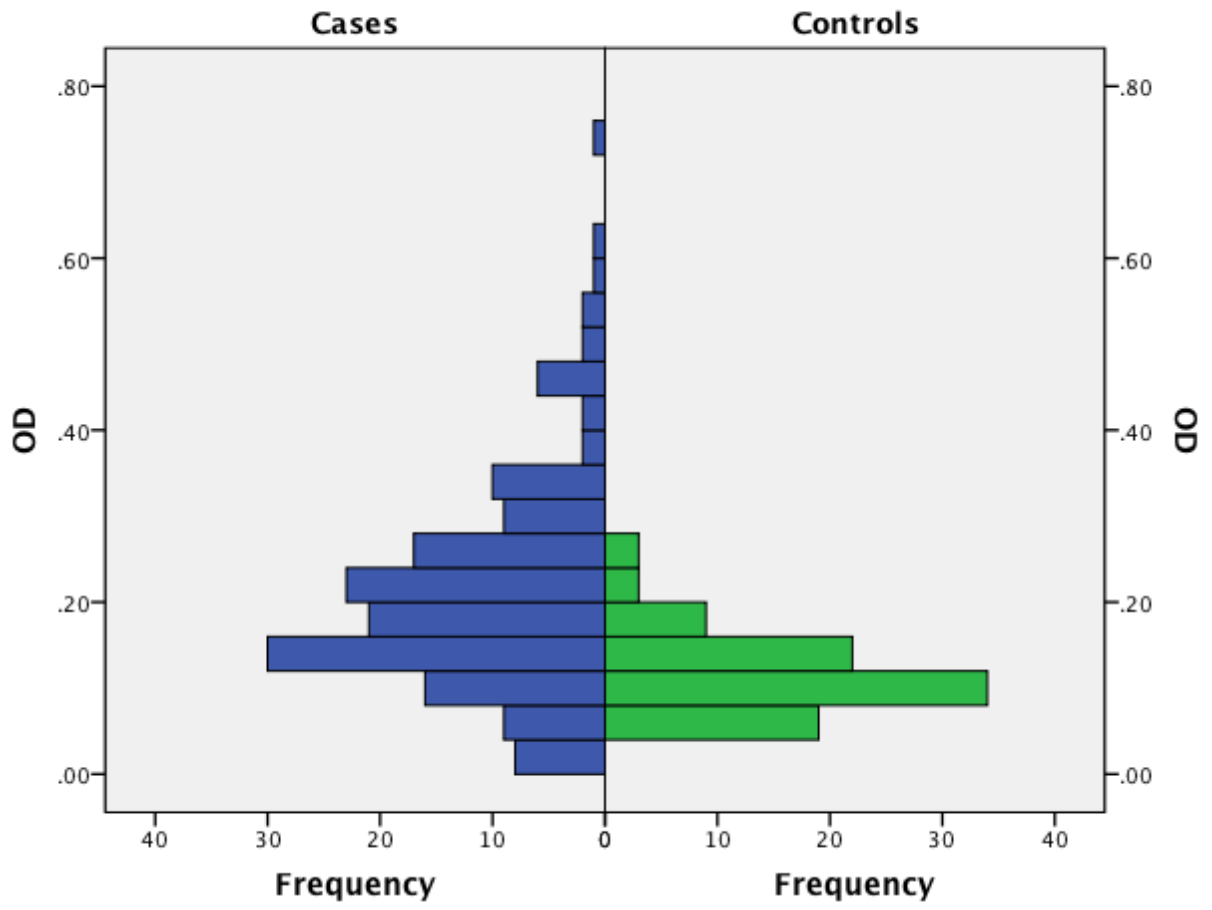

### I. survivin

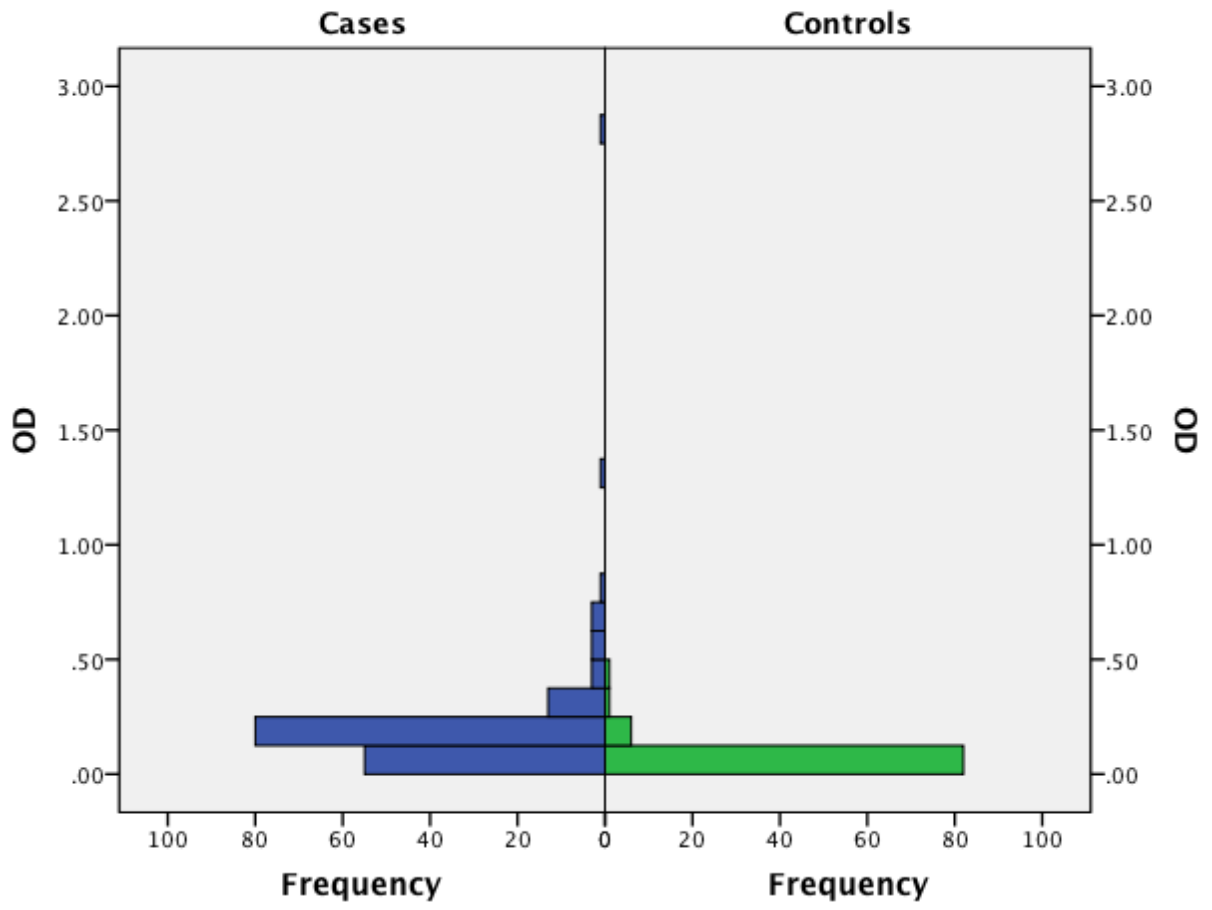

Supplement: 262_2018_2135_MOESM1_ESM.pdf [file 262_2018_2135_MOESM1_ESM.pdf]
